# Supplementary material for: Abnormal brain structure in atopic dermatitis: Evidence from Mendelian randomization study
Source: PubMed Central journal article supplement (PMC10654478; doi:10.1111/srt.13515), 2023-11-16
Supplement: SRT-29-e13515-s001.pdf [file SRT-29-e13515-s001.pdf]

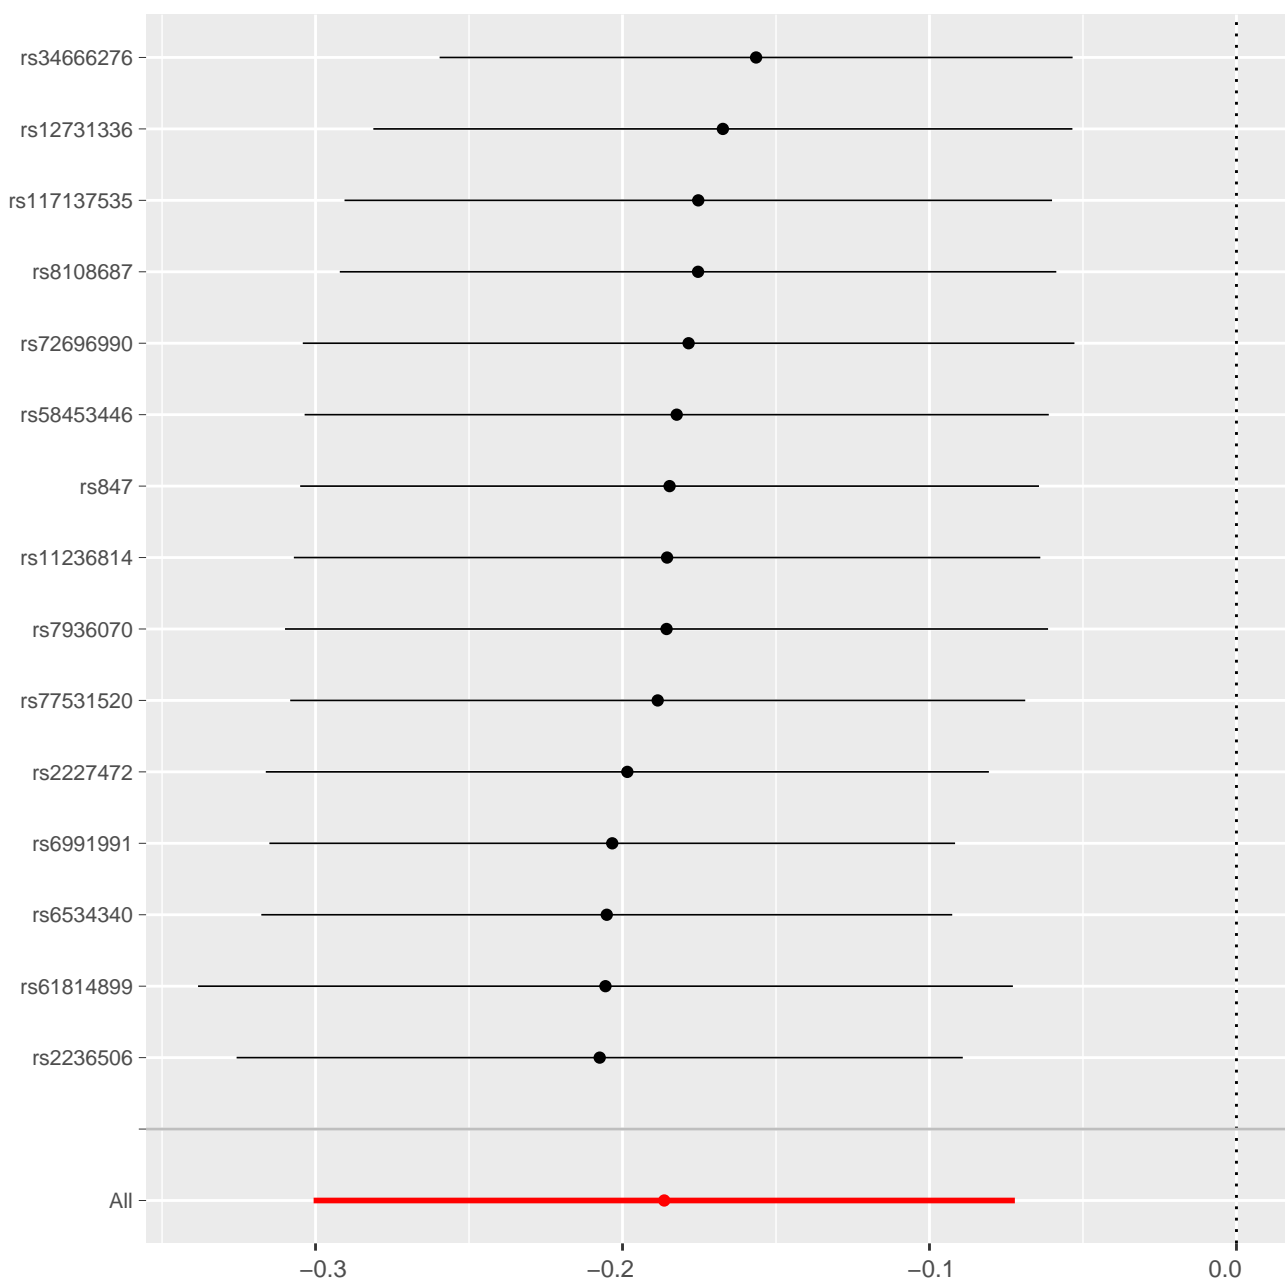

Supplementary Figure1. Leave-one-out sensitivity analysis for AD in caudate volume.

# MR Method

- Inverse variance weighted
- MR Egger

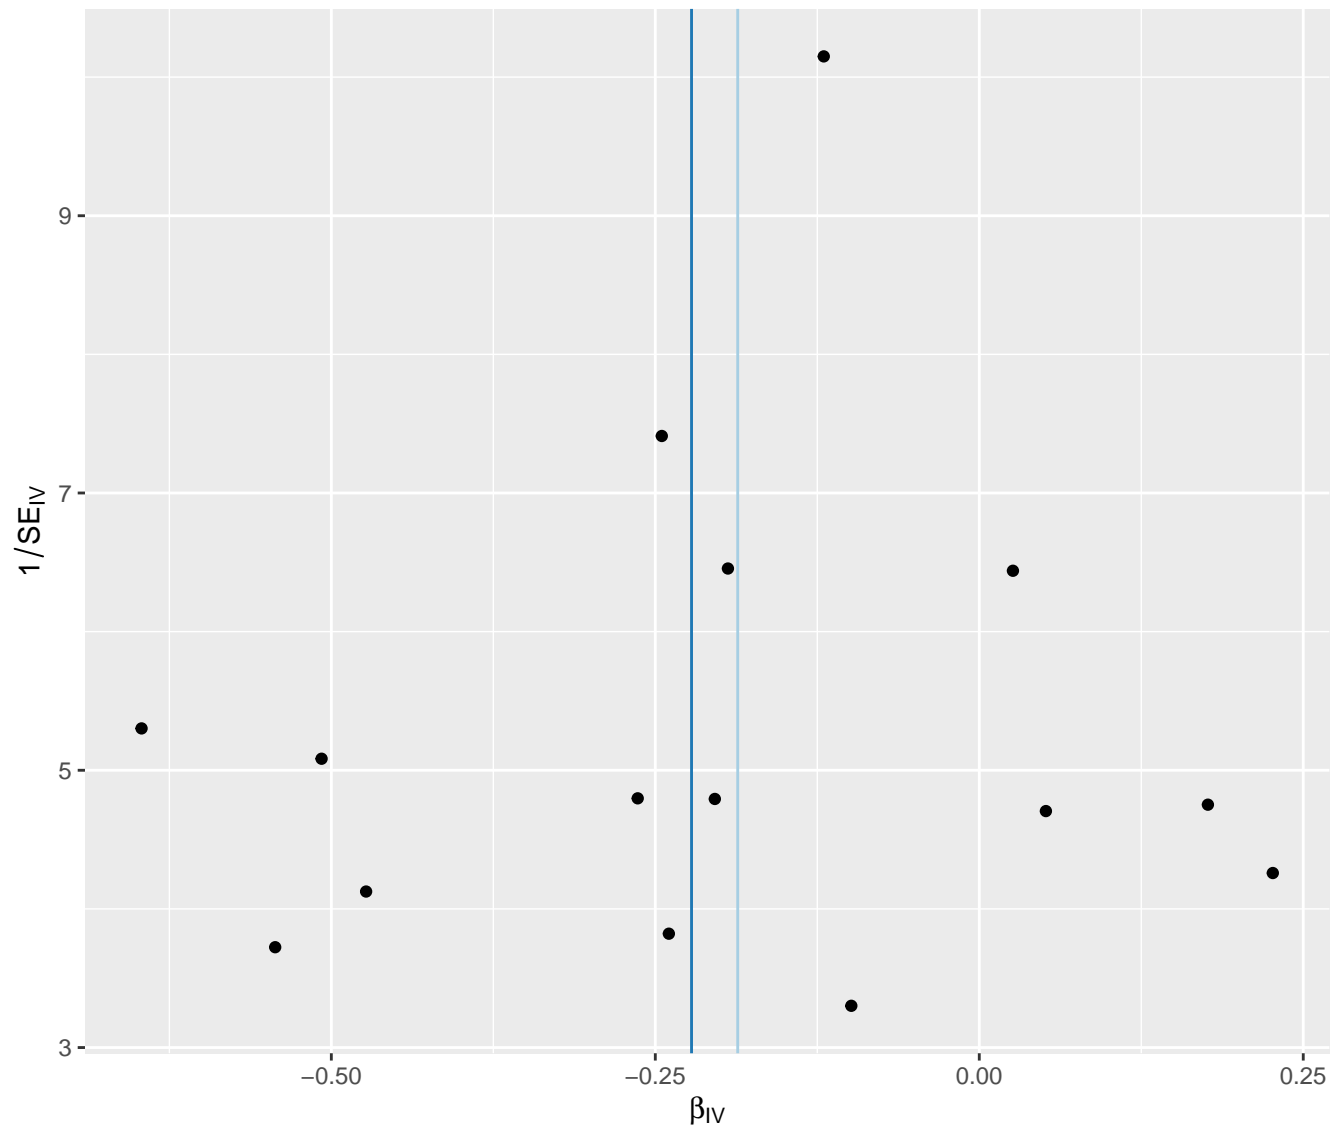

Supplementary Figure2. Funnel plot for AD in caudate volume.

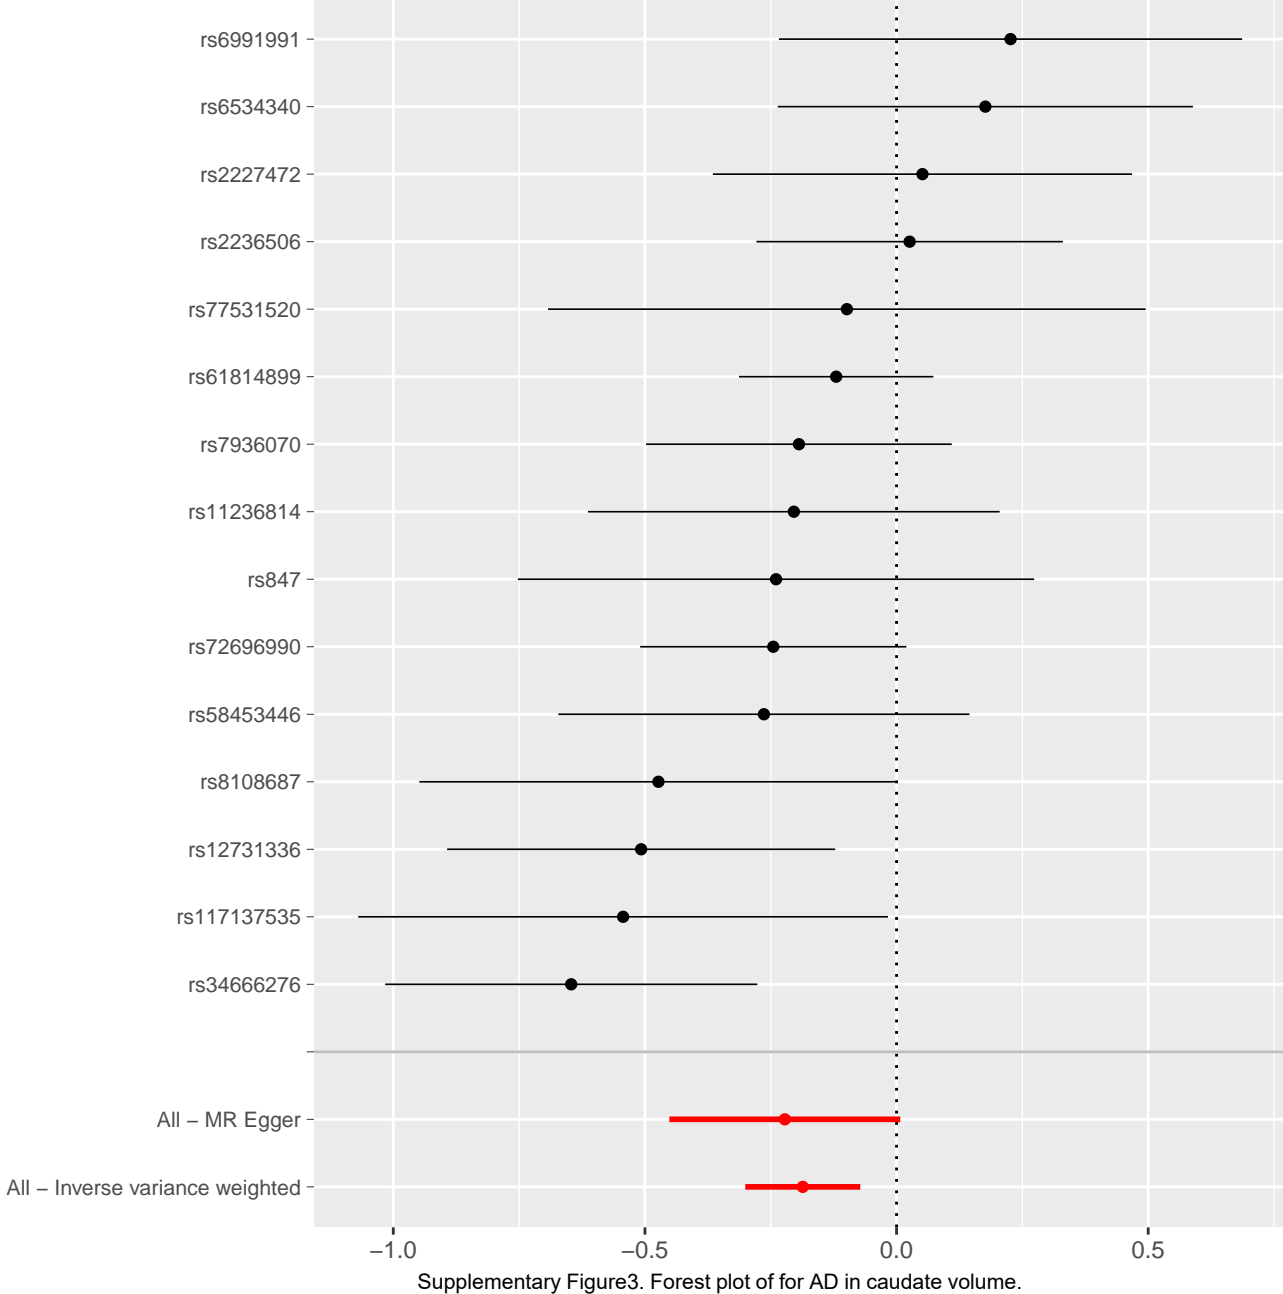

MR Test

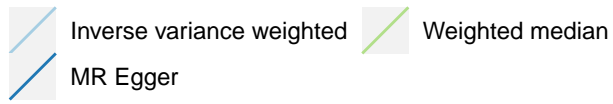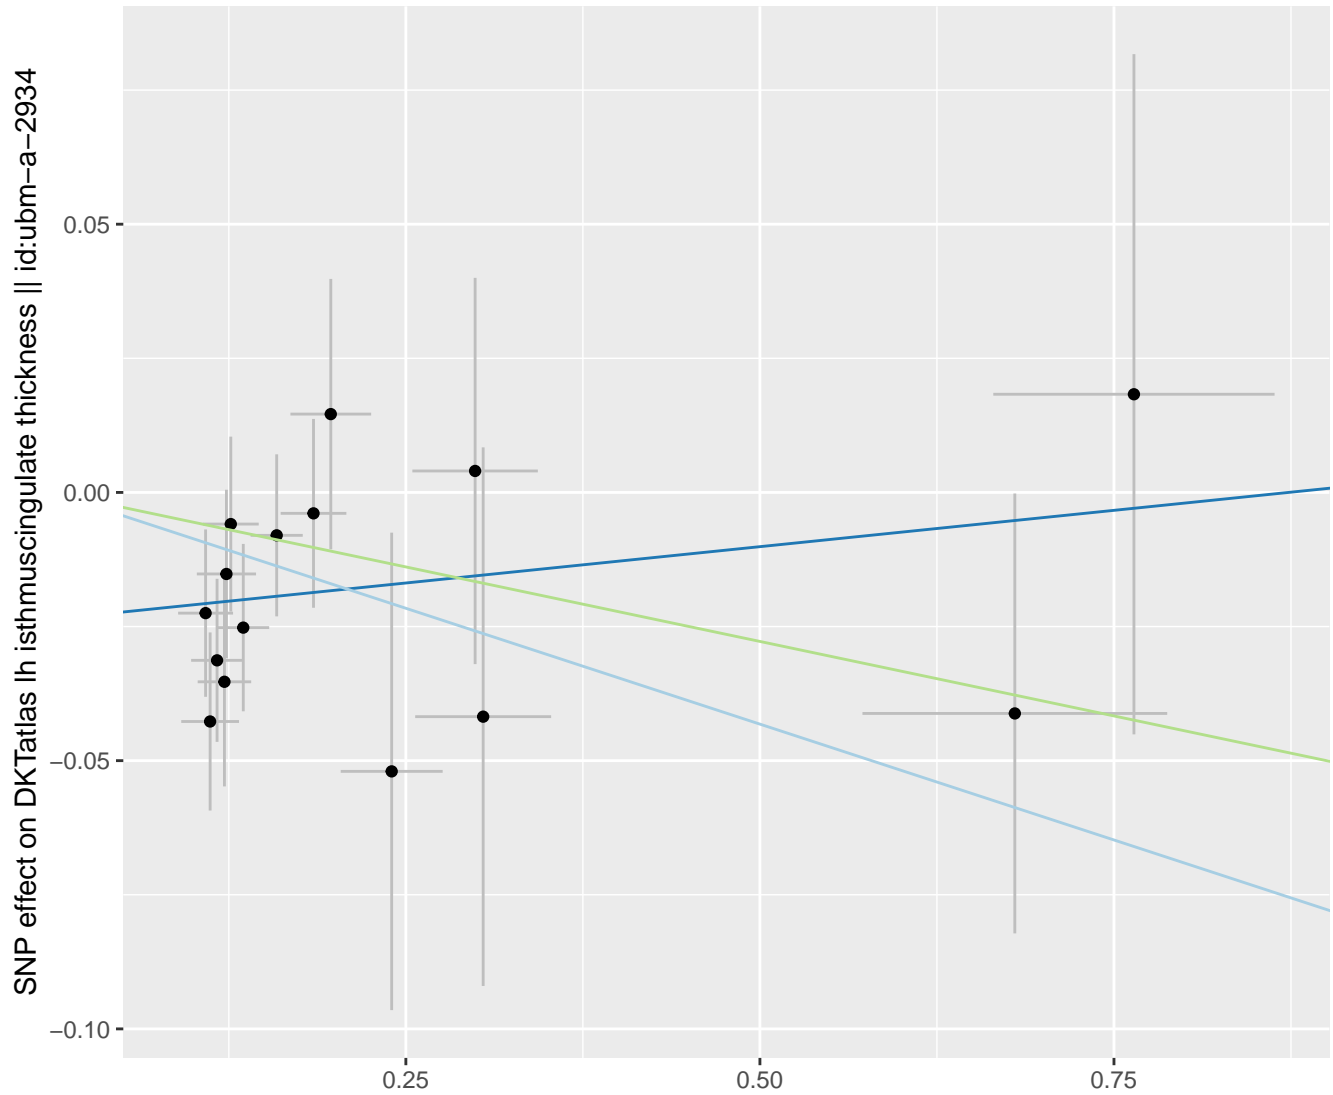

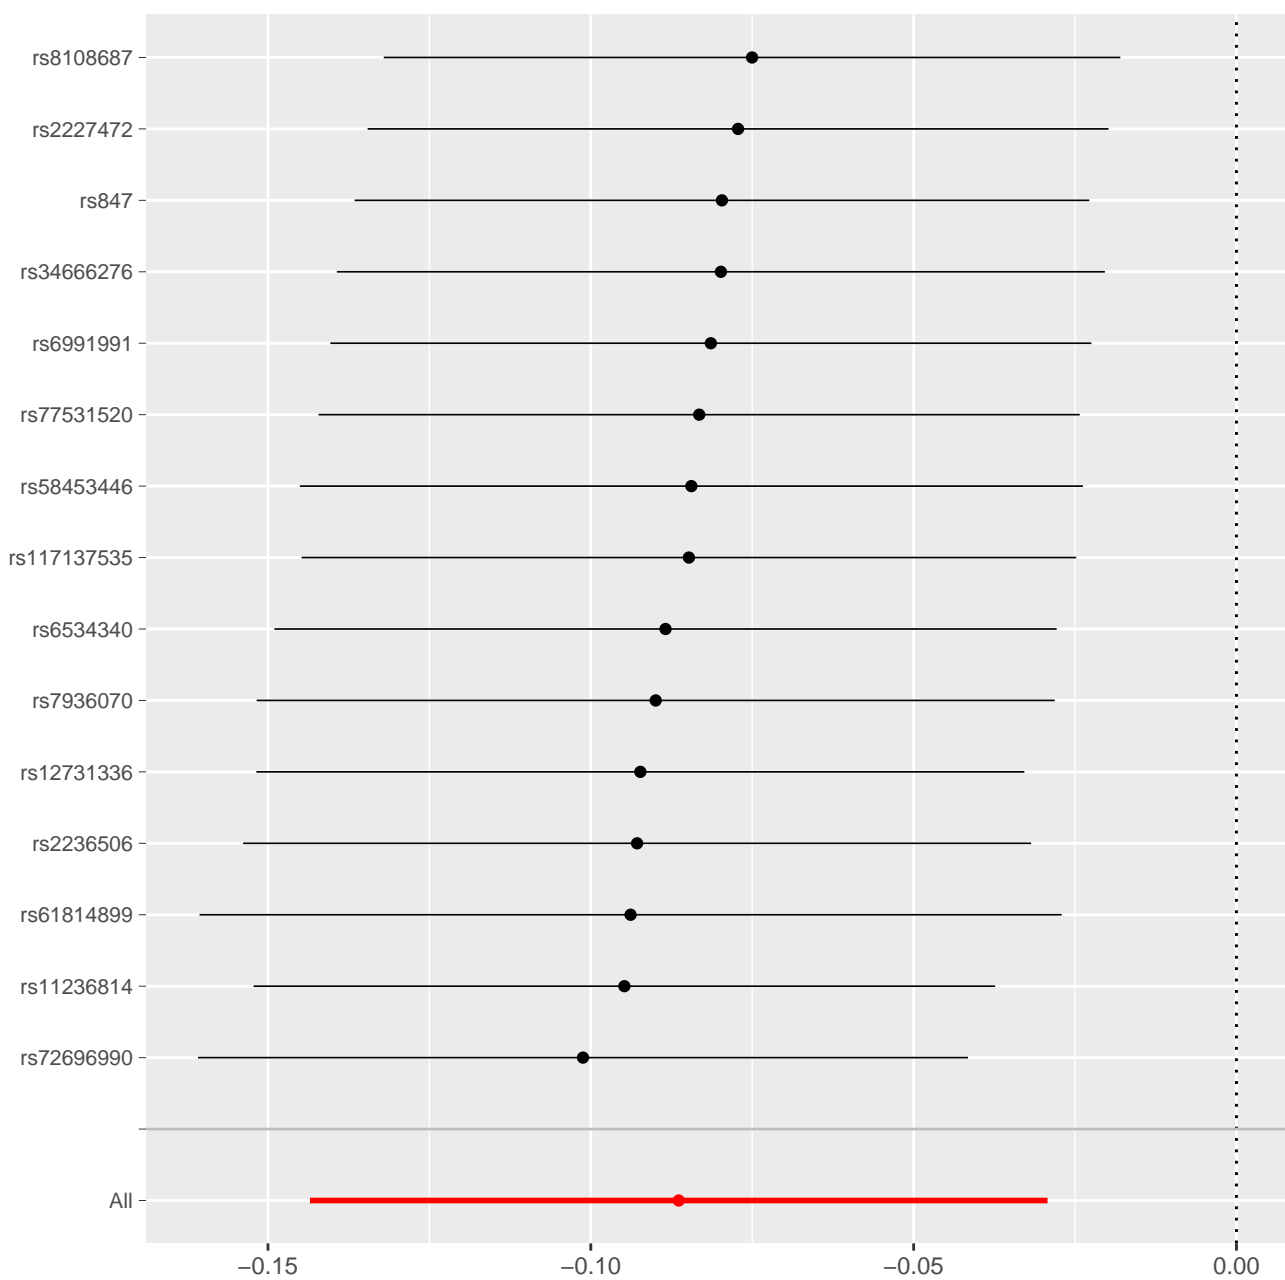

Supplementary Figure5. Leave-one-out sensitivity analysis for AD in isthmus cingulate thickness.

### MR Method

- Inverse variance weighted
- MR Egger

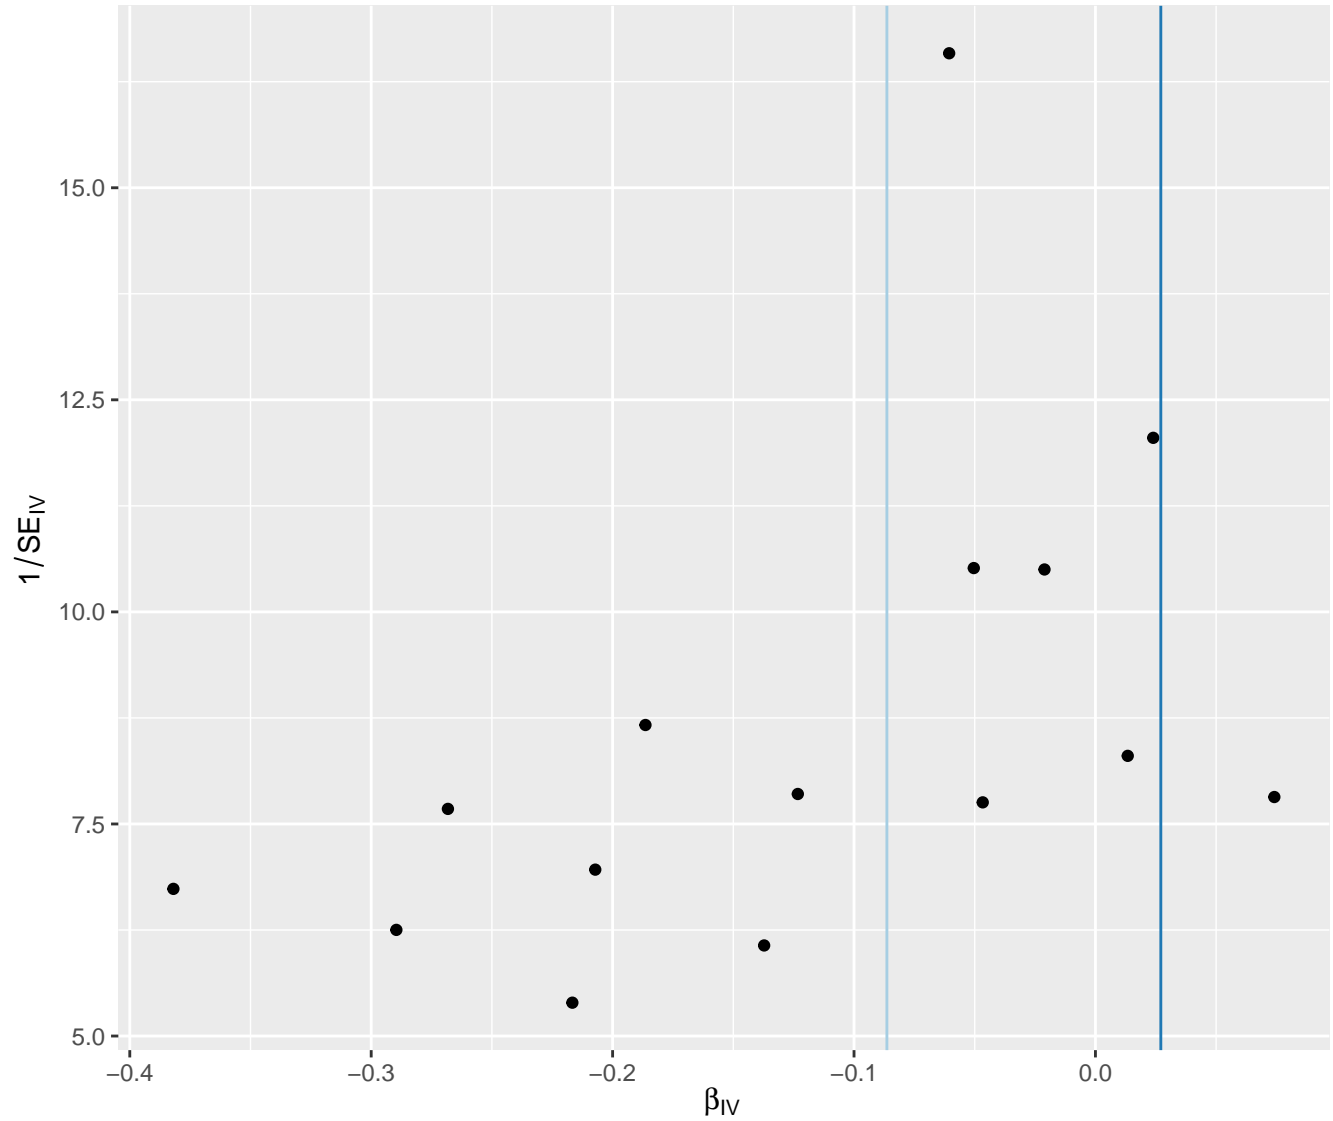

Supplementary Figure6. Funnel plot for AD in isthmus cingulate thickness.

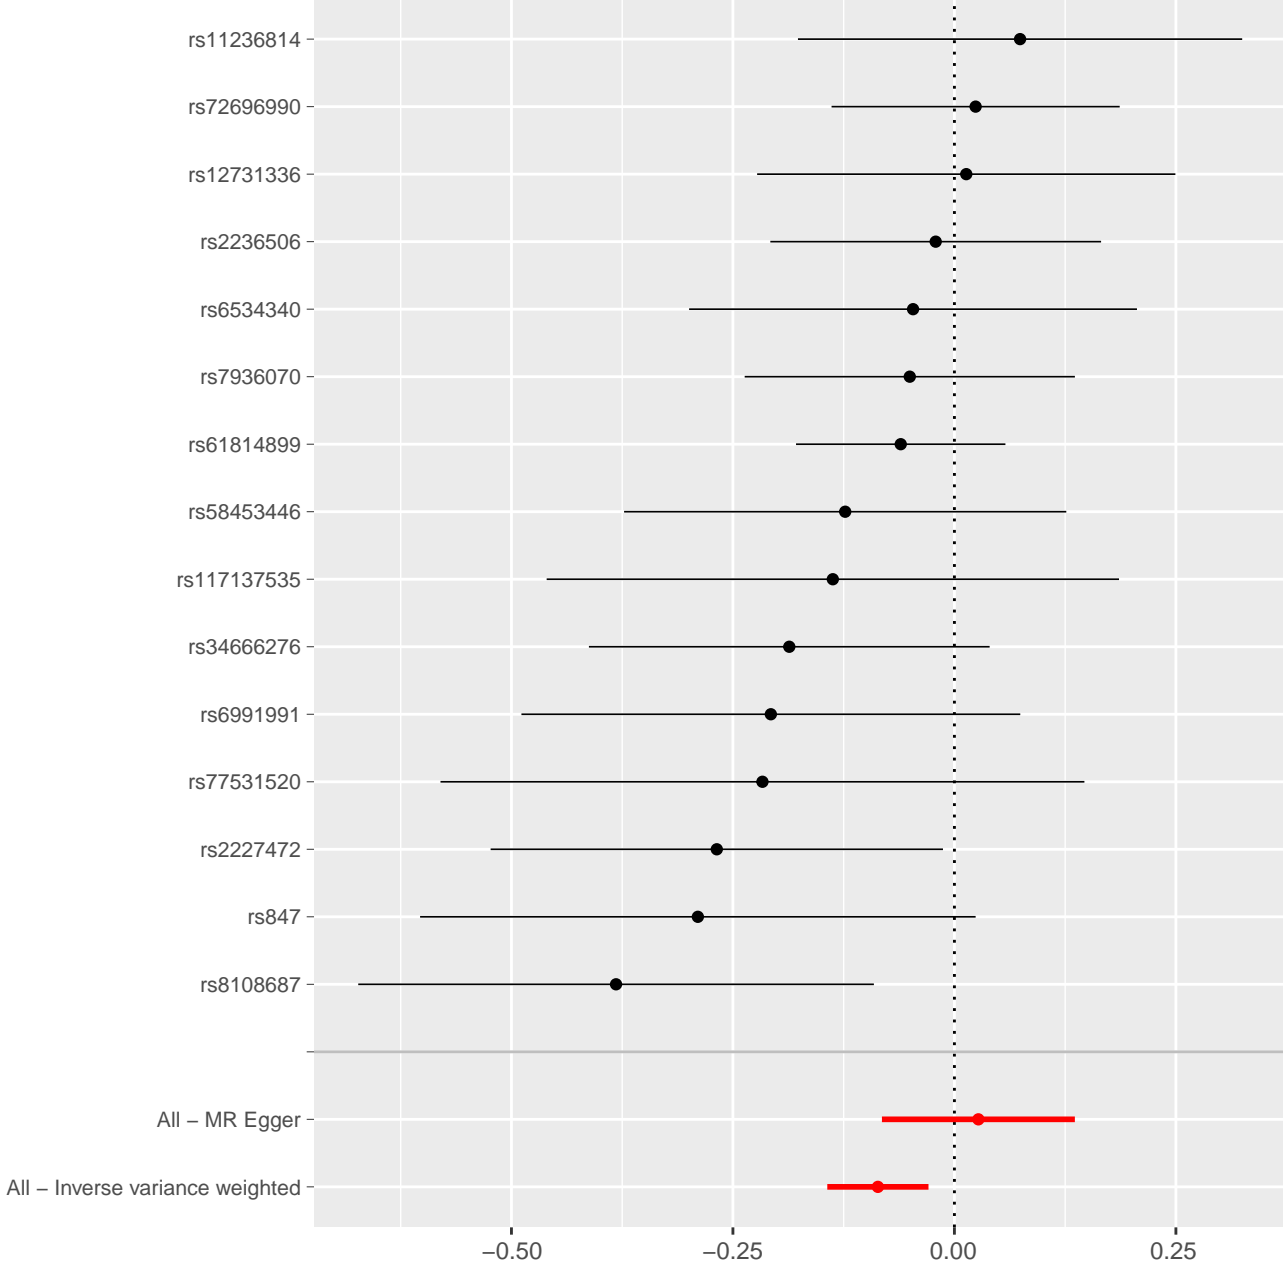

Supplementary Figure7. Forest plot of for AD in isthmus cingulate thickness.





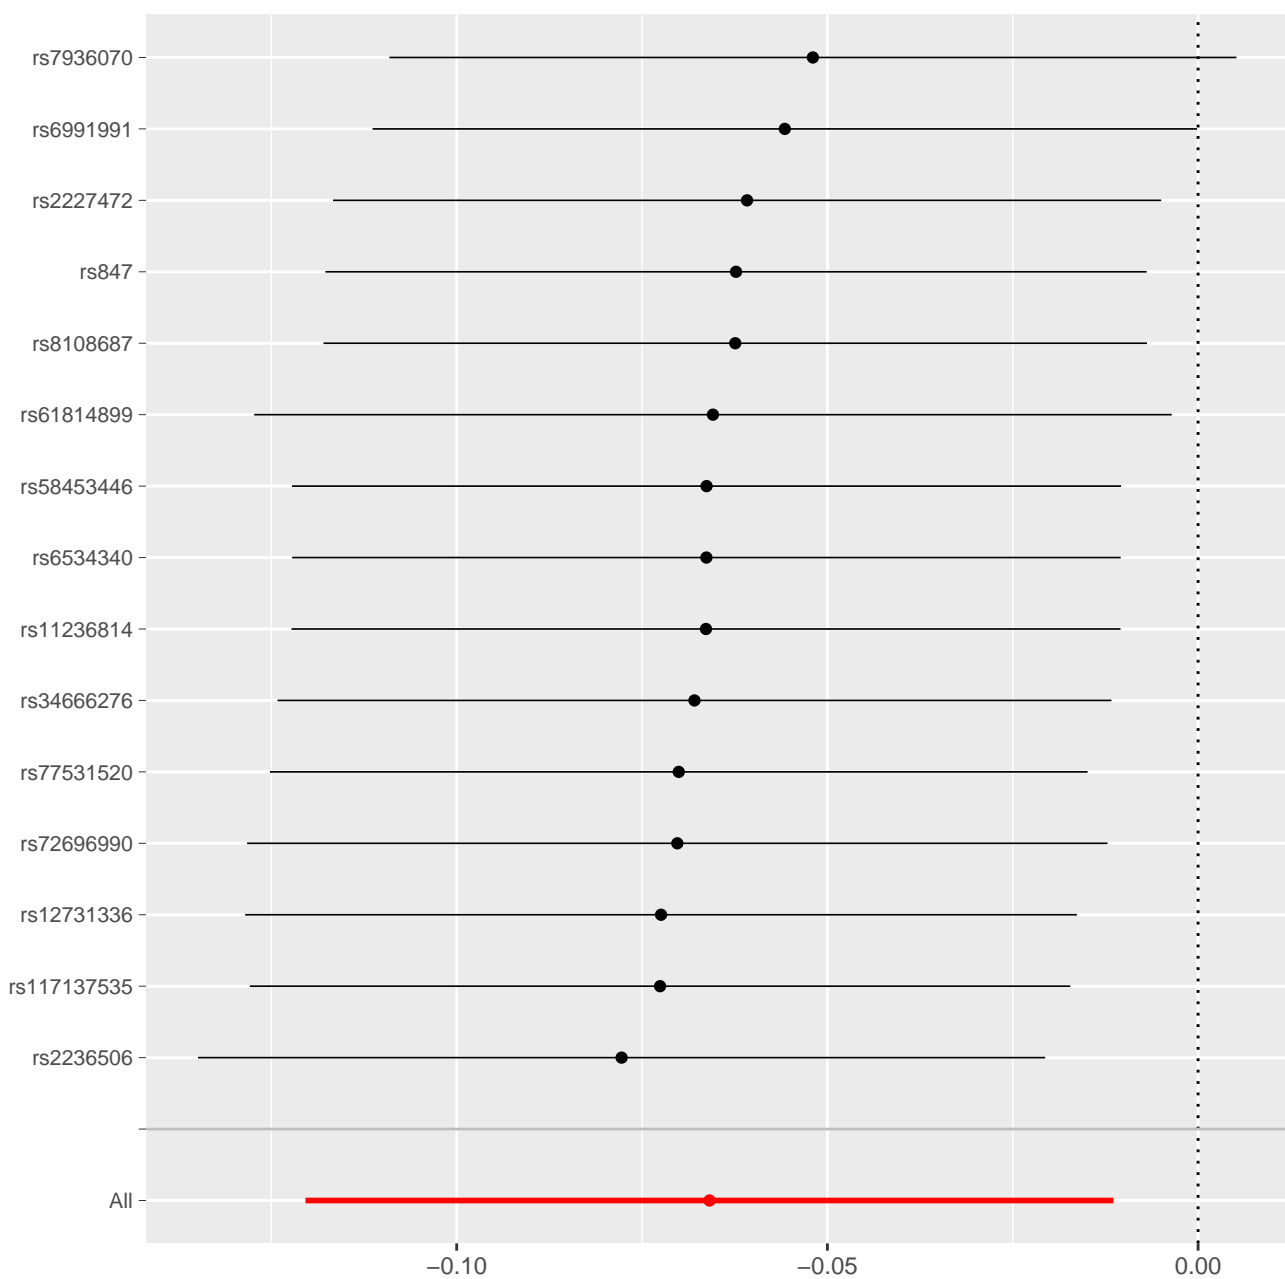

Supplementary Figure9. Leave-one-out sensitivity analysis for AD in posterior cingulate thickness.

### MR Method

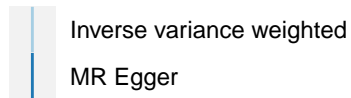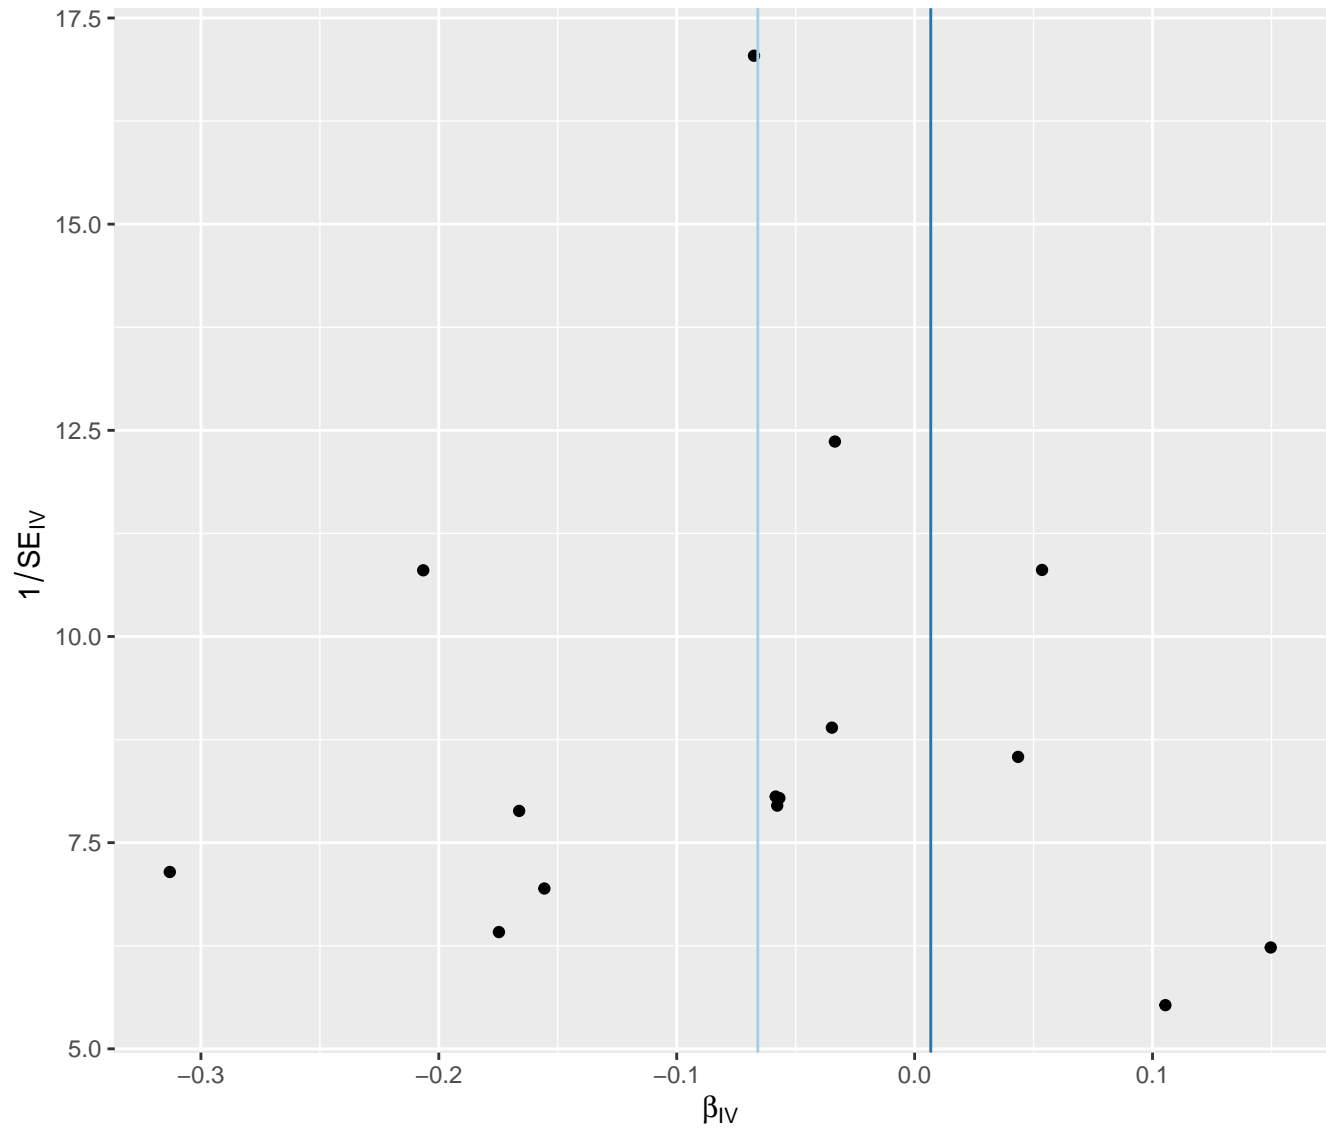

Supplementary Figure10. Funnel plot for AD in posterior cingulate thickness.

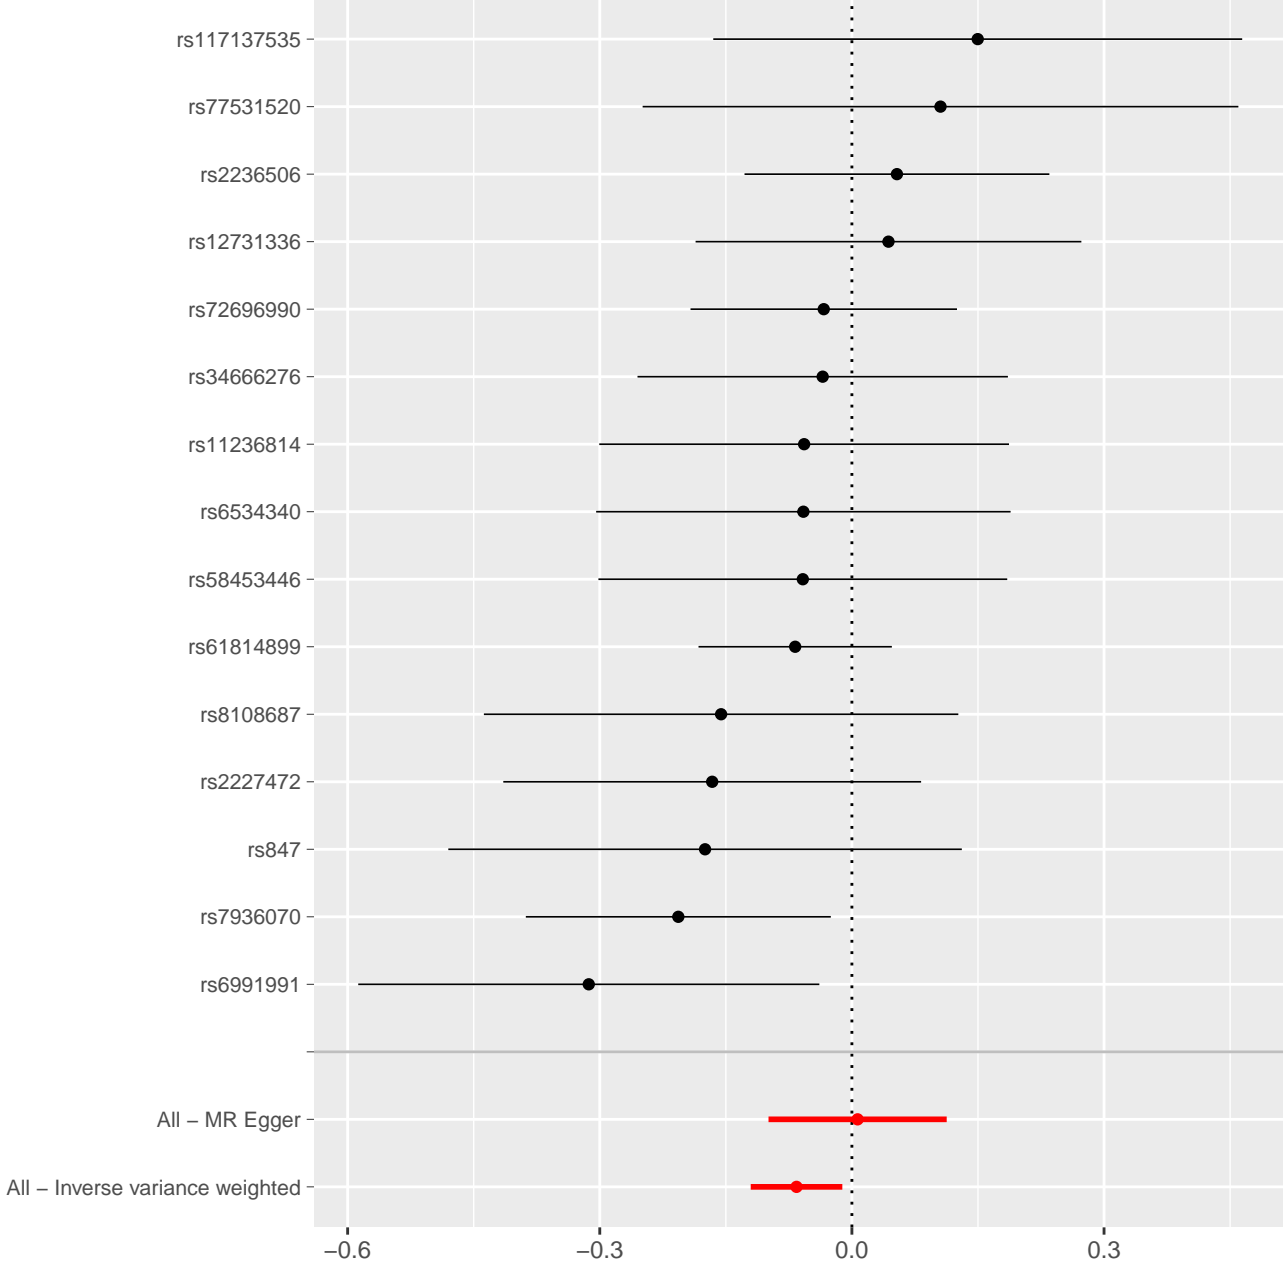

Supplementary Figure11. Forest plot of for AD in posterior cingulate thickness.

SNP effect on DKTatlas rh supramarginal area || id:ubm-a-2849

MR Test

- Inverse variance weighted
- MR Egger
- Weighted median

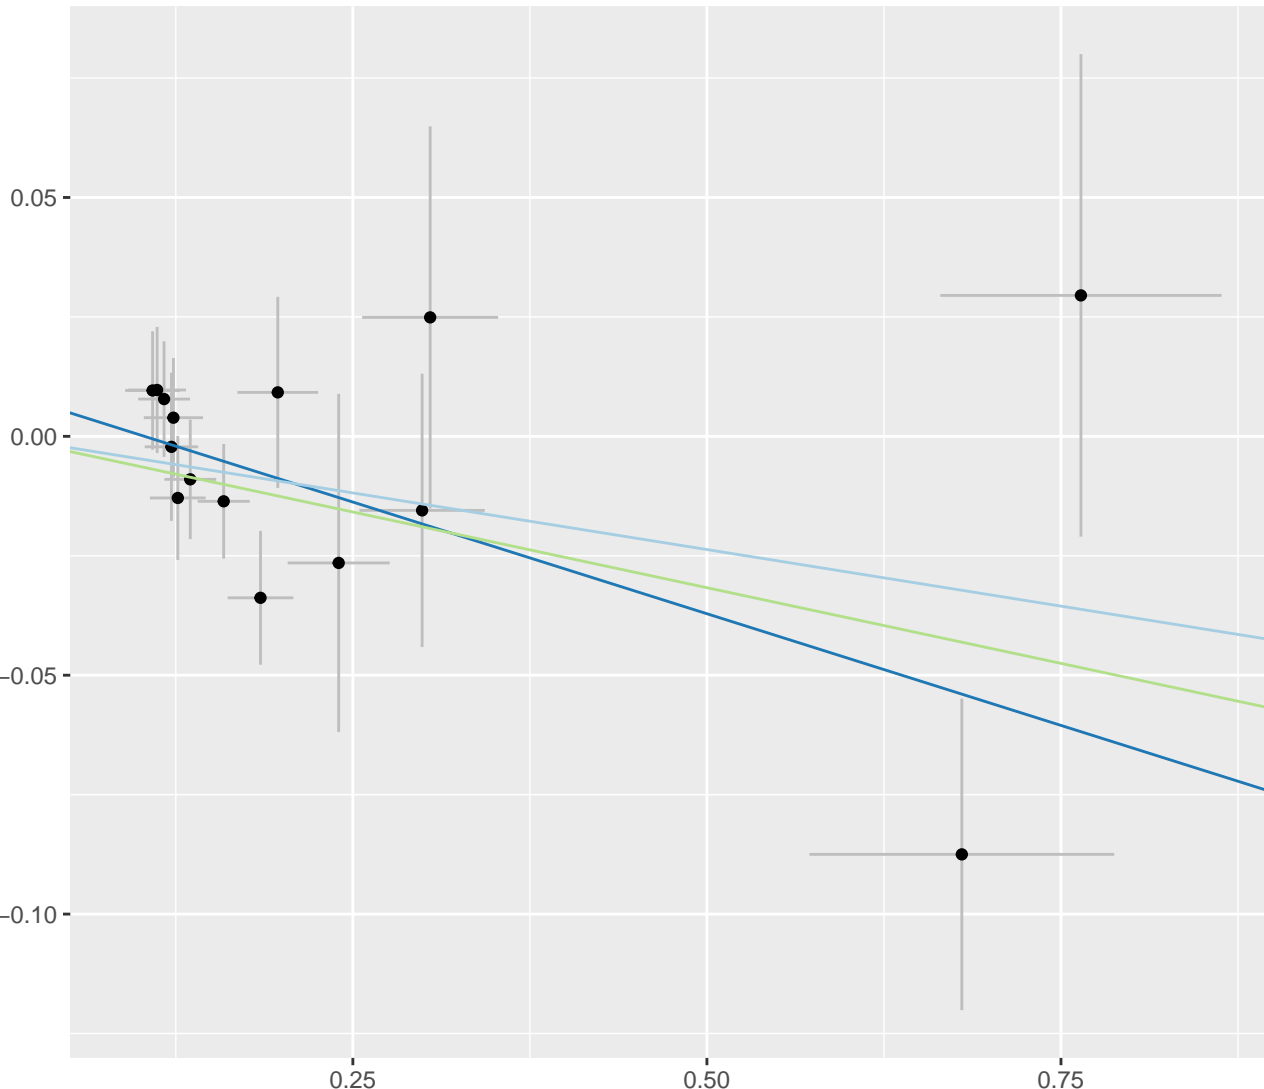

Supplementary Figure12. MR scatter plot of MR analyses for AD in isthmus cingulate

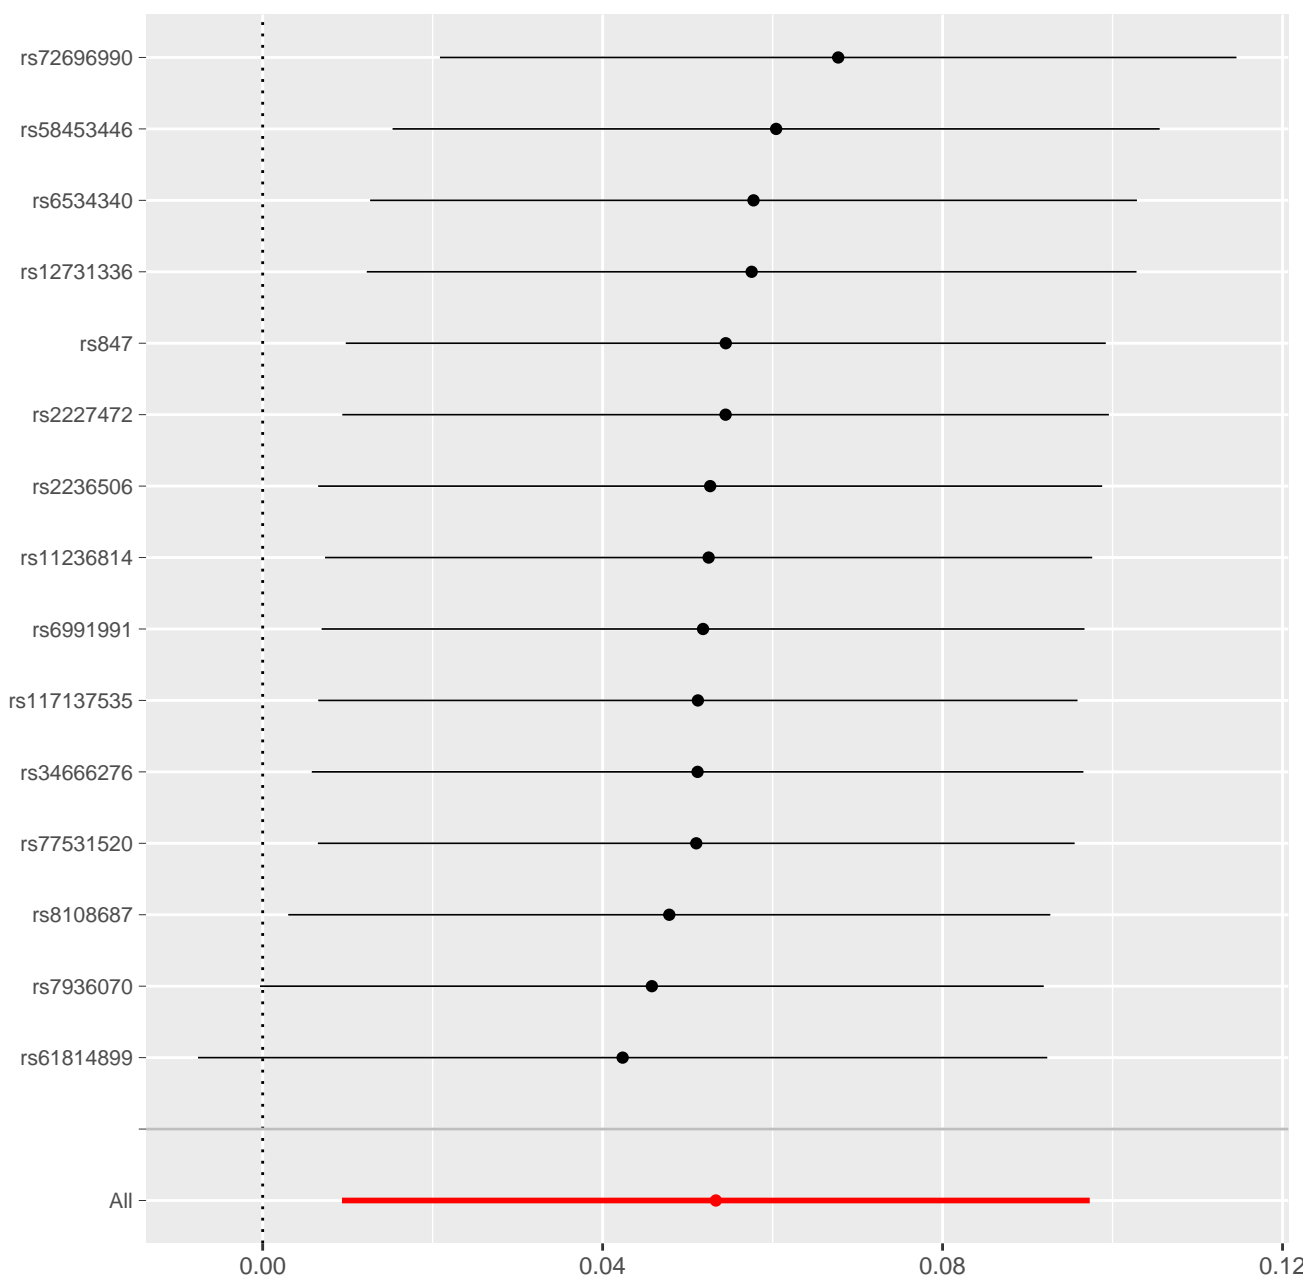

Supplementary Figure13. Leave-one-out sensitivity analysis for AD in isthmus cingulate area.

### MR Method

- Inverse variance weighted
- MR Egger

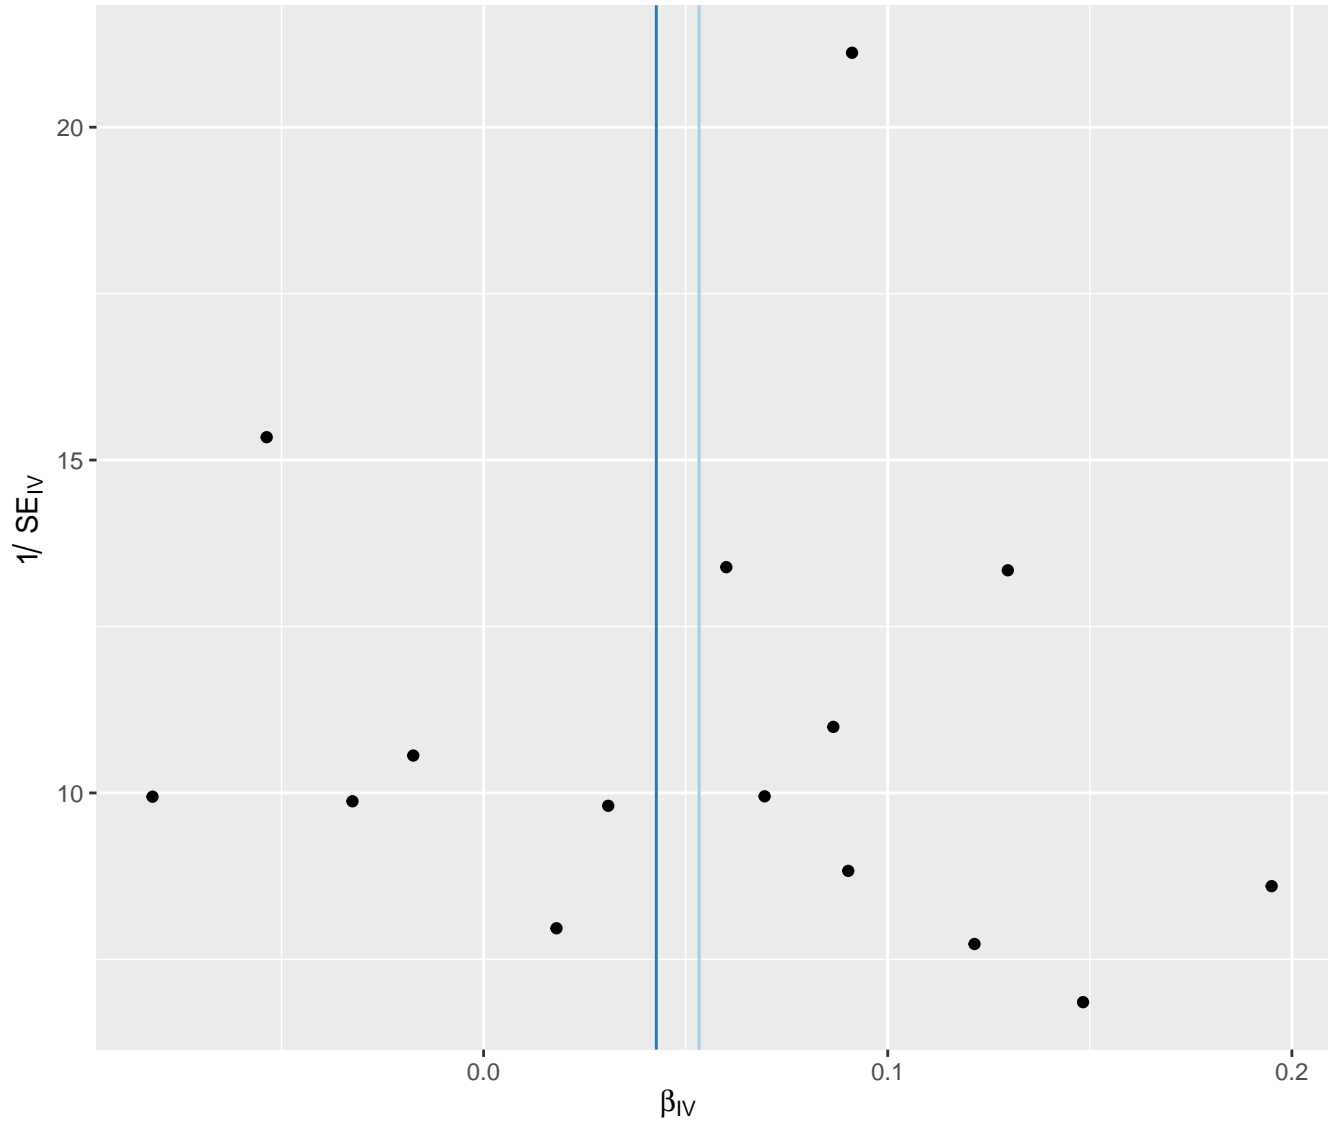

Supplementary Figure 14. Funnel plot for AD in isthmus cingulate area.

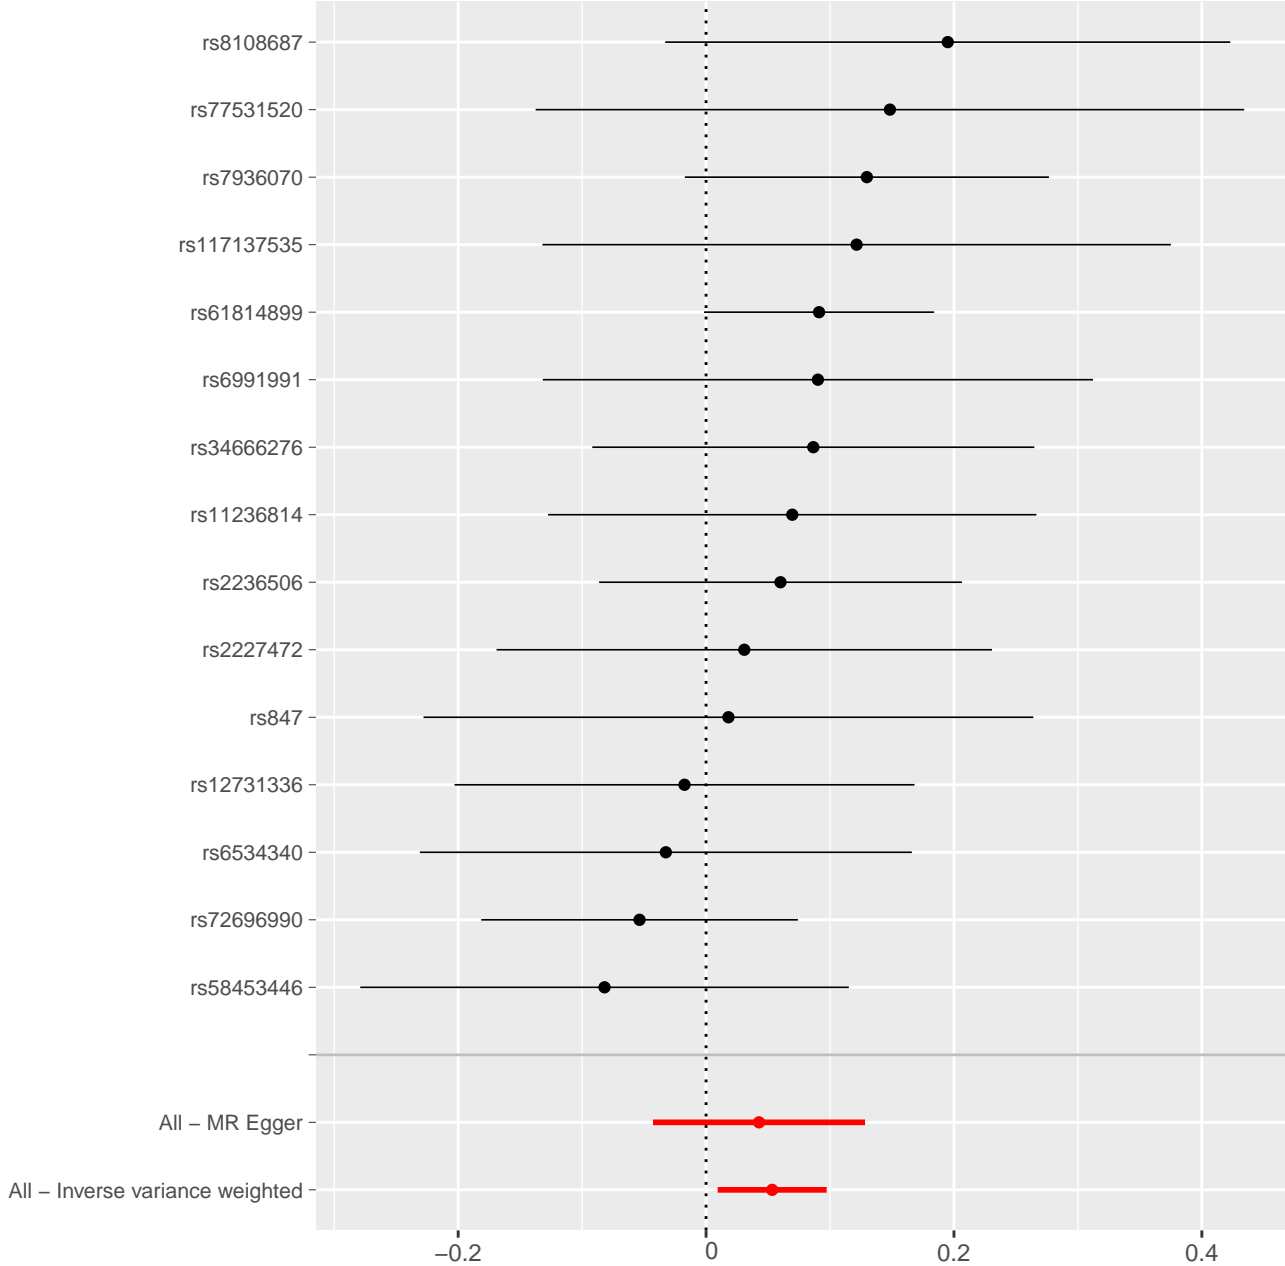

Supplementary Figure15. Forest plot of for AD in isthmus cingulate area.

MR Test

- Inverse variance weighted
- MR Egger
- Weighted median

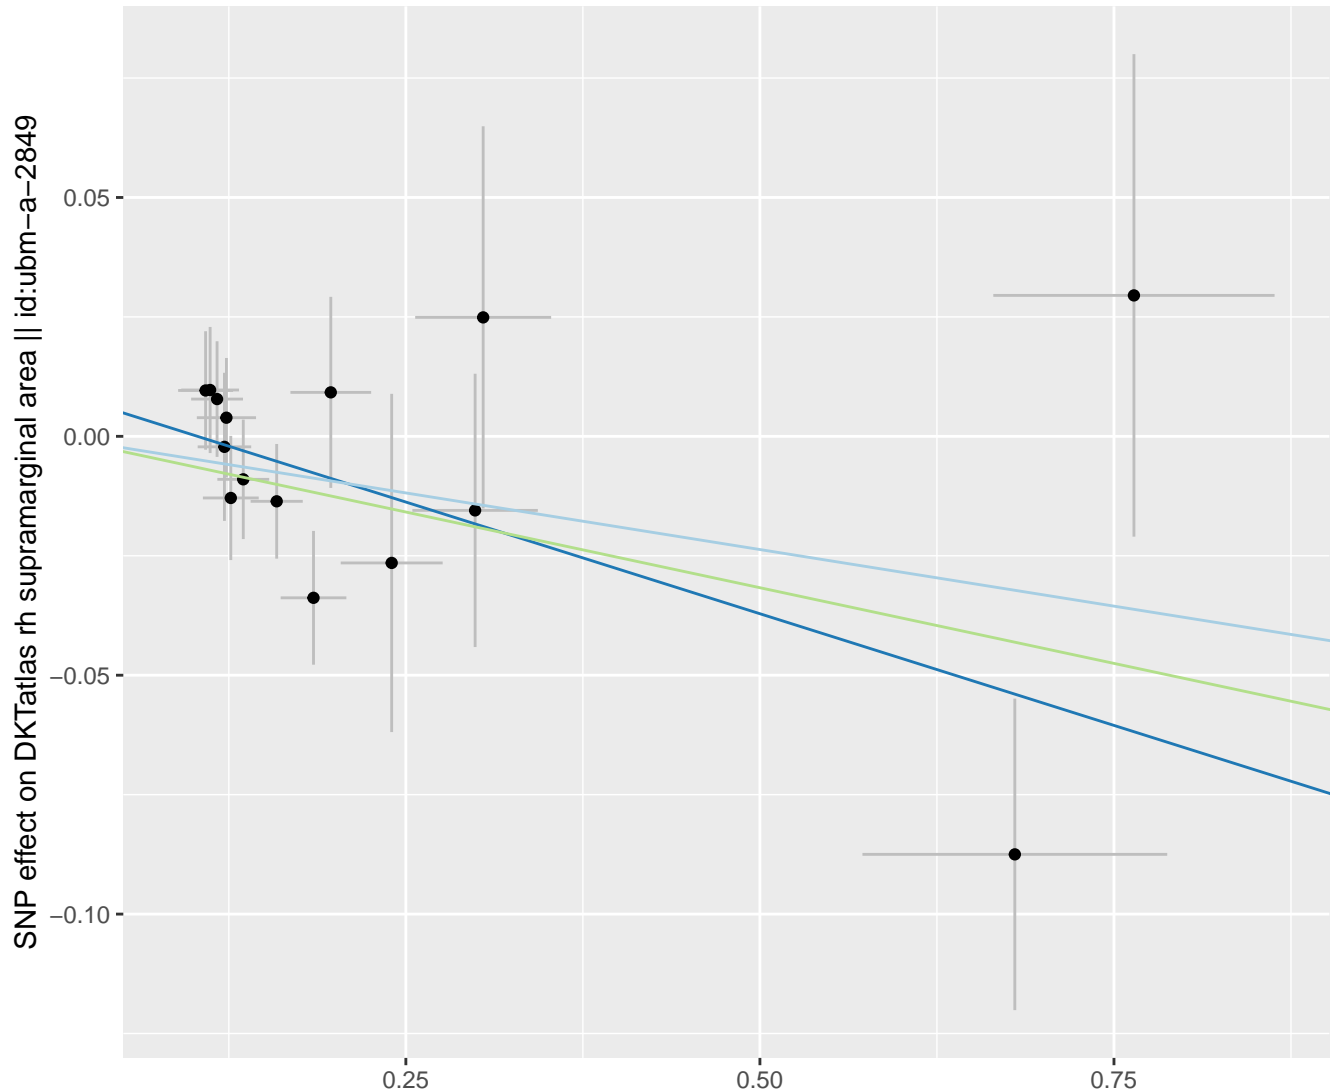

Supplementary Figure16. MR scatter plot of MR analyses for AD in supramarginal area



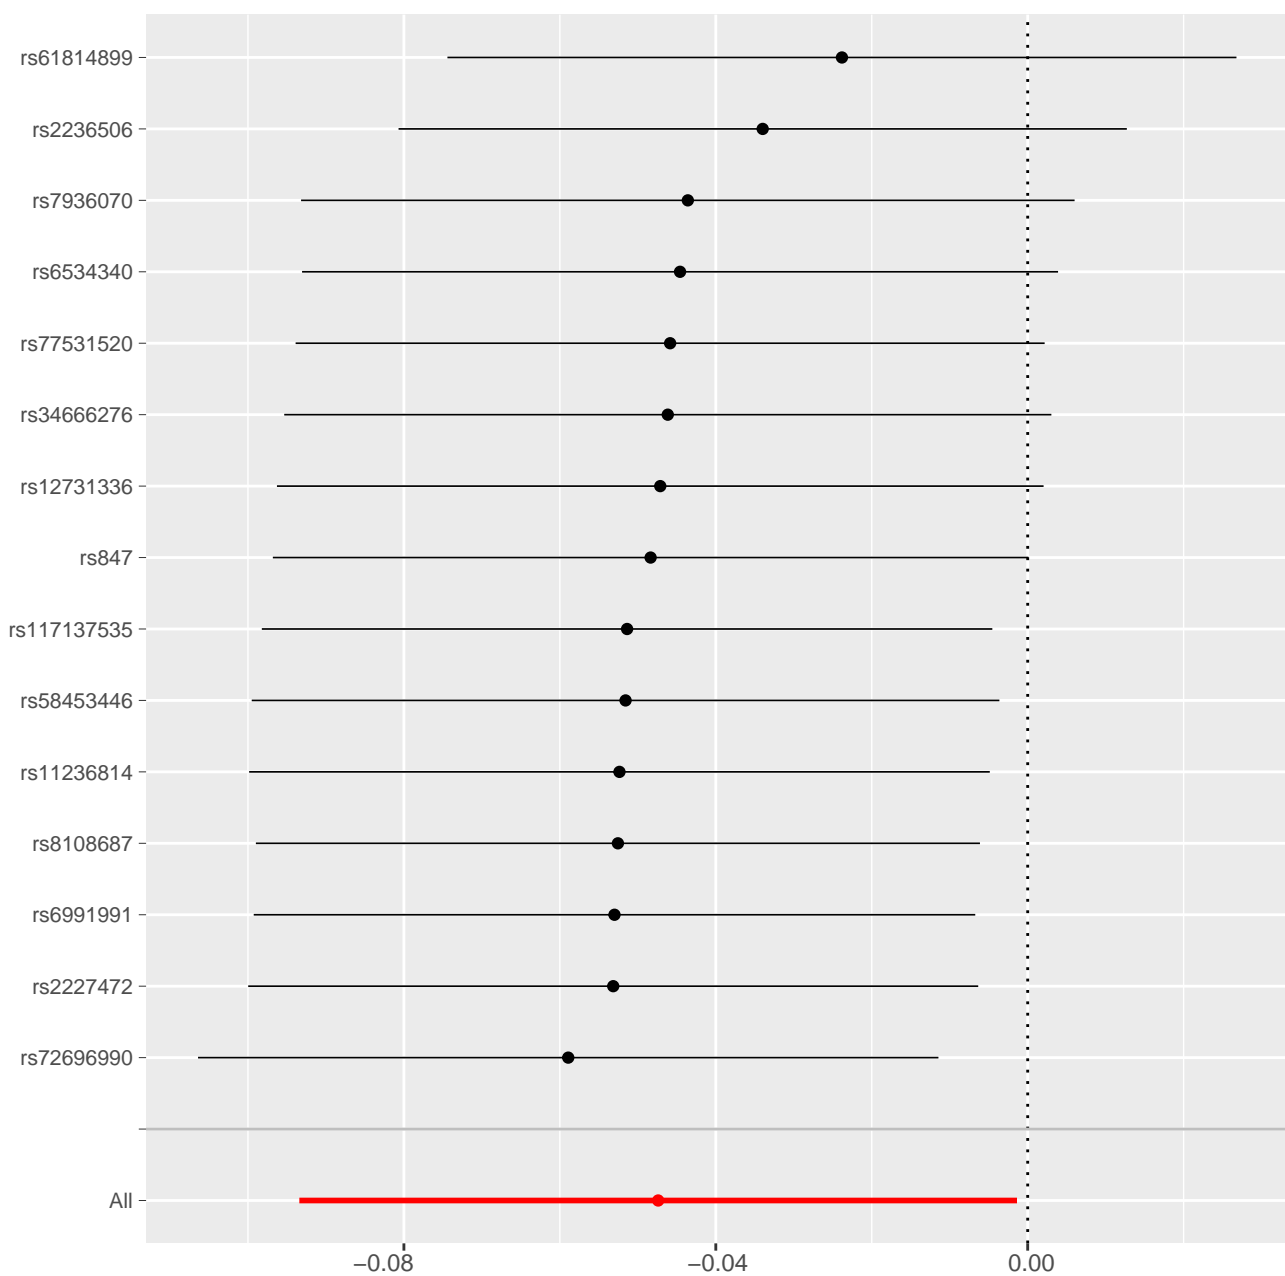

Supplementary Figure17. Leave-one-out sensitivity analysis for AD in supramarginal area.

### MR Method

- Inverse variance weighted
- MR Egger

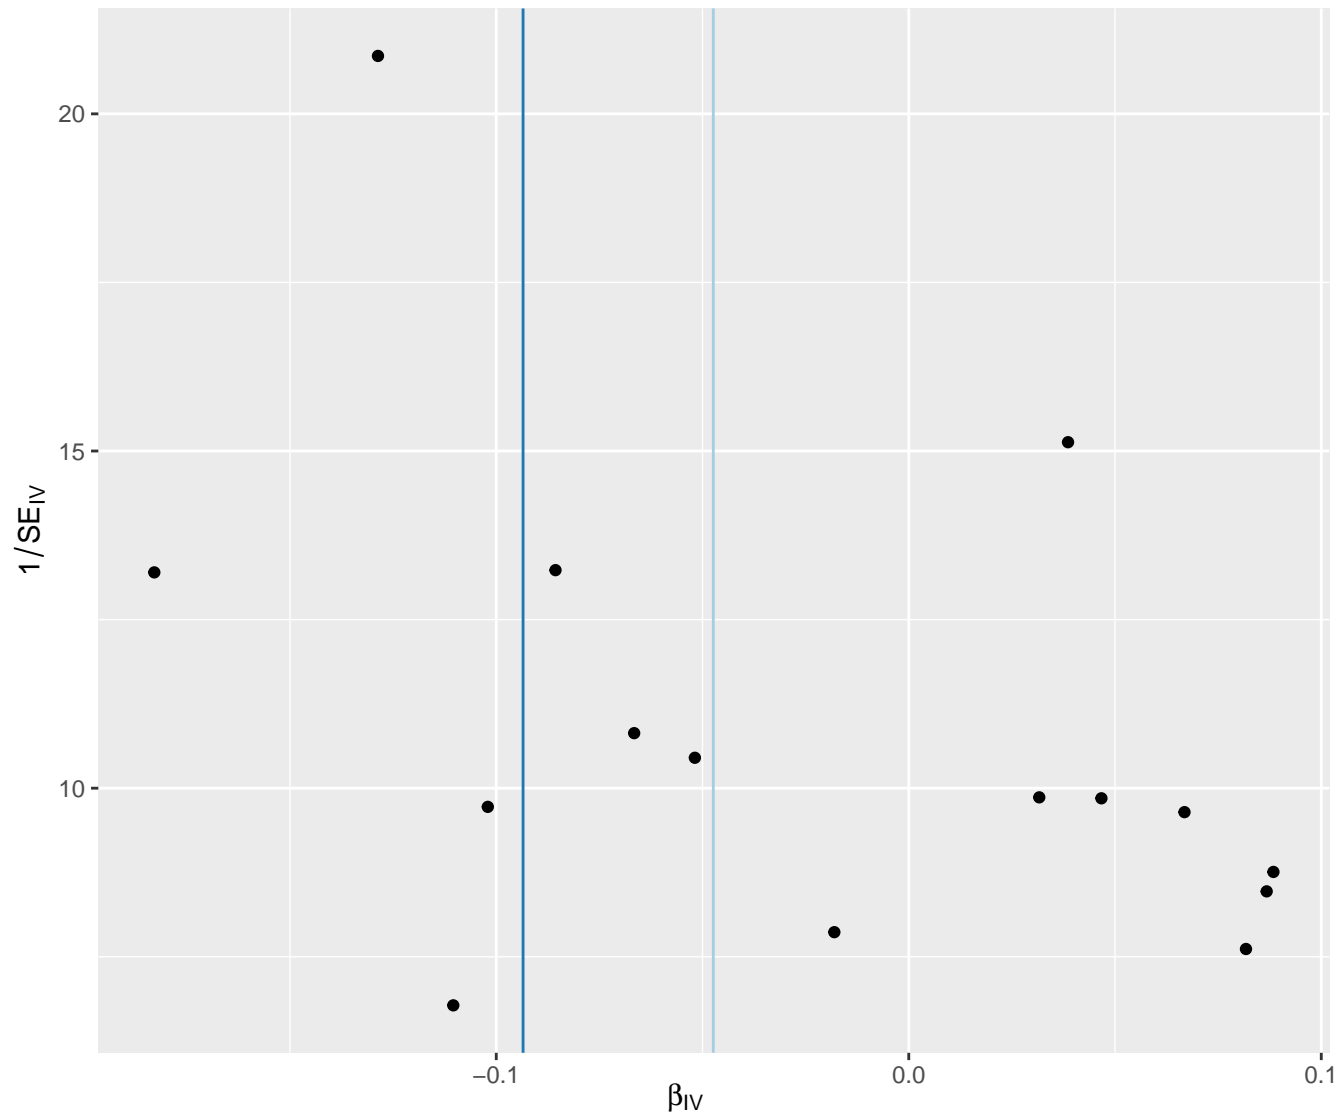

Supplementary Figure18. Funnel plot for AD in supramarginal area.

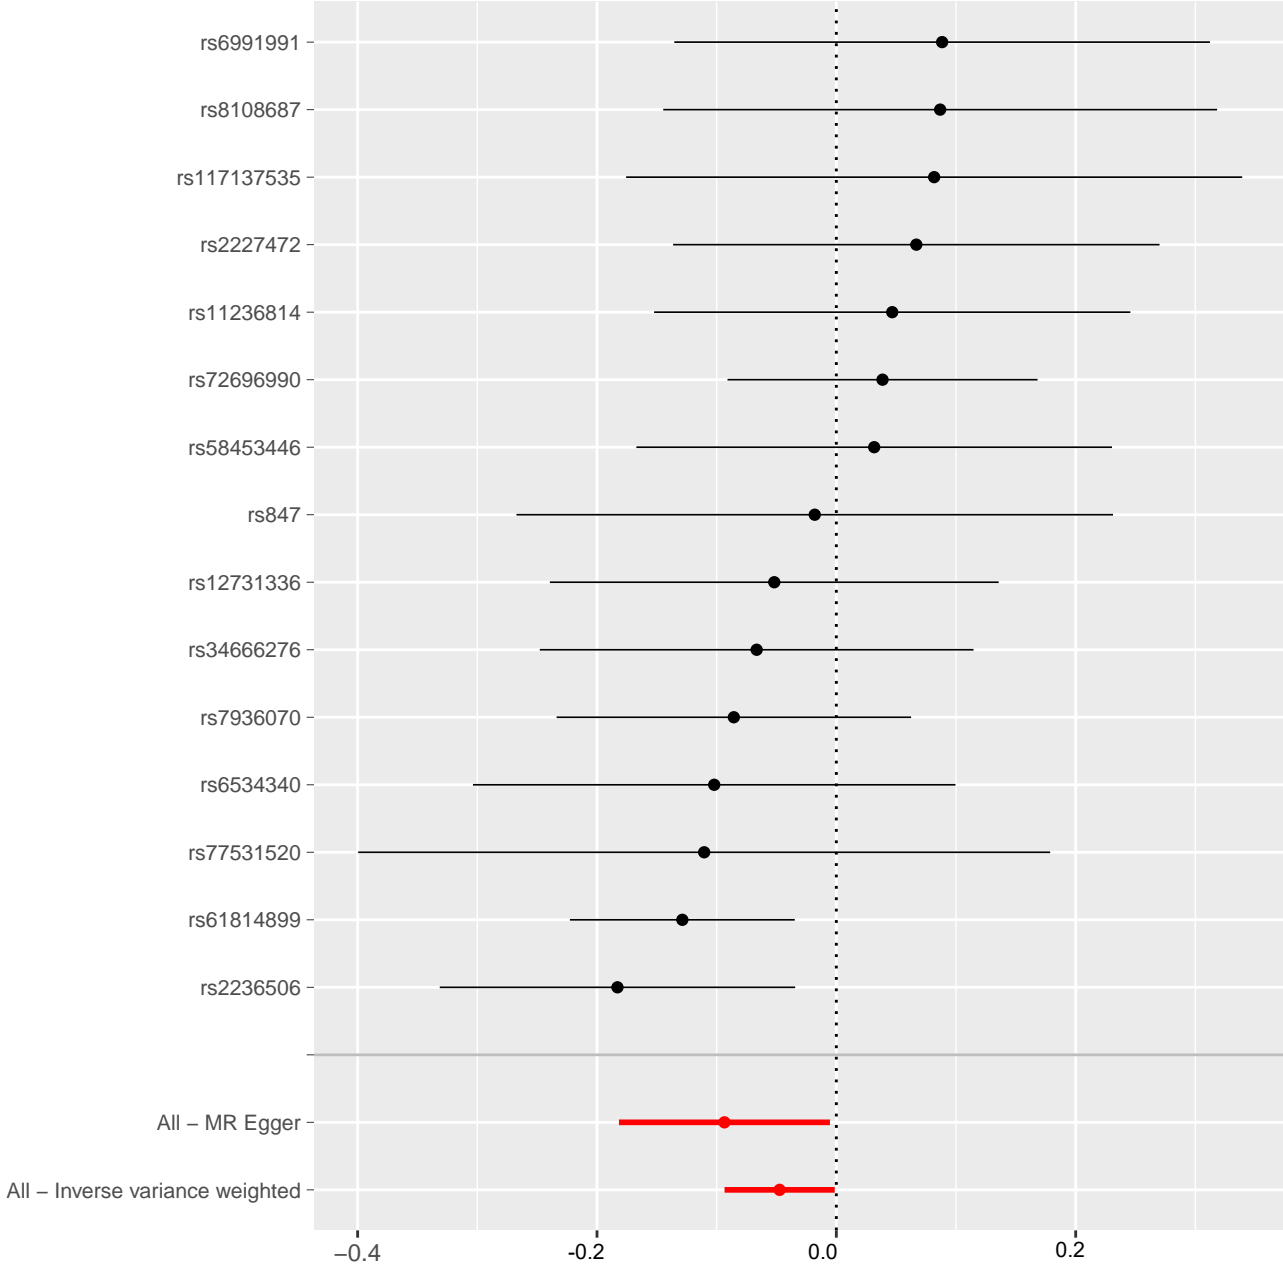

Supplementary Figure19. Forest plot of for AD in supramarginal area.
